# Supplementary material for: A sustainable viscosity-sensitive isoliquiritigenin-based molecular sensor for liquid food safety inspection
Source: Royal Society of Chemistry journal article supplement (doi:10.1039/d2fb00013j), 2022-12-13
Supplement: d2fb00013j1.pdf [file d2fb00013j1.pdf]

# Sustainable Food Technology

## Electronic Supplementary Information

### **A sustainable viscosity-sensitive isoliquiritigenin-based molecular sensor for liquid food safety inspection**

Lingfeng Xu<sup>1,2,\*</sup>, Mingqing Kang<sup>1</sup>, Fangzhi Xiong<sup>1</sup>, Yanrong Huang<sup>3</sup>, Xiuguang Yi<sup>4</sup>

*1 Key Laboratory of Biodiversity and Ecological Engineering of Jiangxi Province, Jingtangshan University, Ji'an, Jiangxi 343009, China*

*2 State Key Laboratory of Luminescent Materials & Devices, Guangdong Provincial Key Laboratory of Luminescence from Molecular Aggregates, College of Materials Science & Engineering, South China University of Technology, Guangzhou 510640, China*

*3 School of Food Science and Engineering, Guangdong Province Key Laboratory for Green Processing of Natural Products and Product Safety, South China University of Technology, Guangzhou 510640, China*

*4 School of Chemistry and Chemical Engineering, Nanchang University, Nanchang 330031, China*

*\* Corresponding author. E-mail: [rs7lfxu@outlook.com](mailto:rs7lfxu@outlook.com).*

## Table of contents

|                 |    |
|-----------------|----|
| Fig. S1 .....   | 1  |
| Fig. S2 .....   | 2  |
| Fig. S3 .....   | 3  |
| Fig. S4 .....   | 4  |
| Fig. S5 .....   | 5  |
| Fig. S6 .....   | 6  |
| Fig. S7 .....   | 7  |
| Fig. S8 .....   | 8  |
| Table S1 .....  | 9  |
| Table S2 .....  | 11 |
| Table S3 .....  | 11 |
| References..... | 12 |

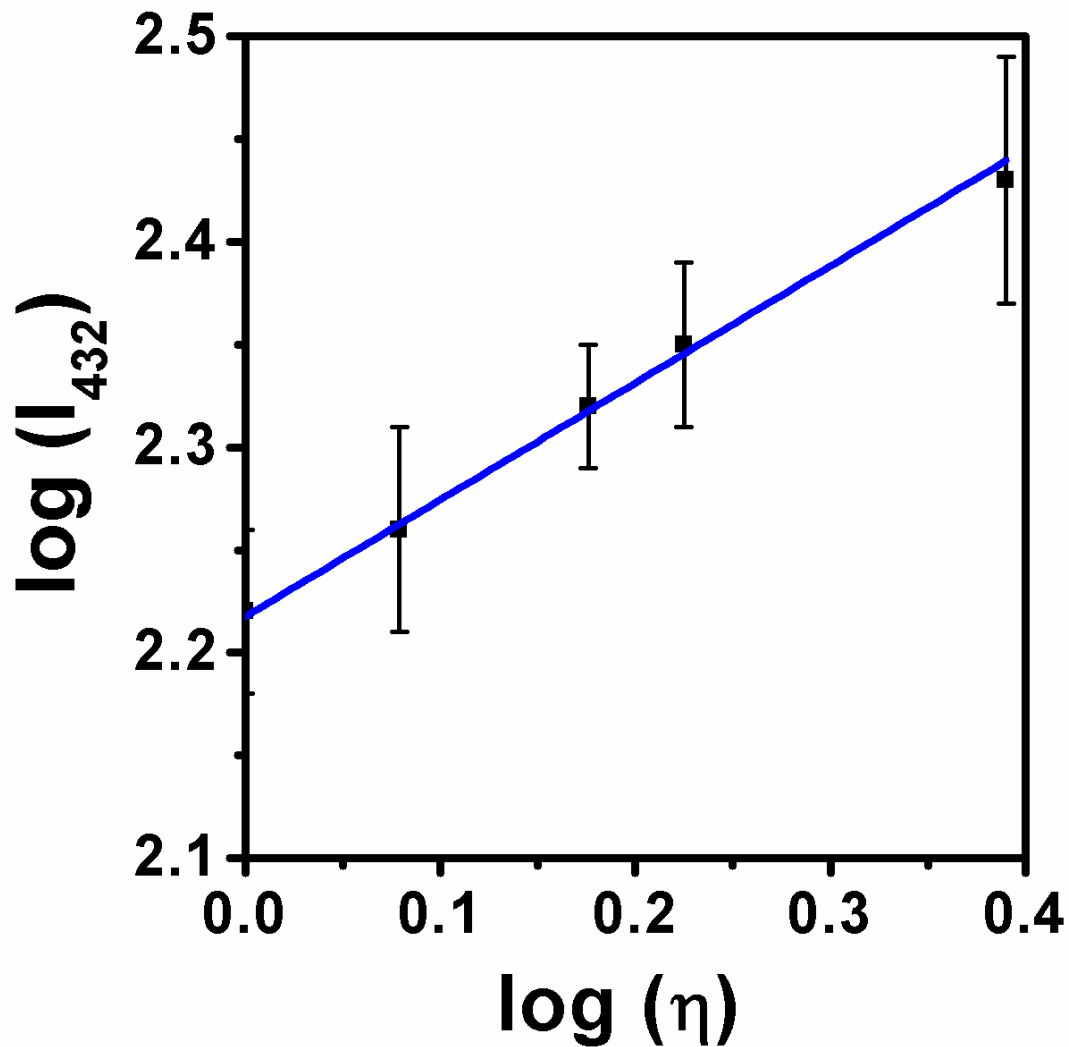

**Fig. S1** Detection limit of the natural molecular sensor isoliquiritigenin.

The calibration curve was first obtained from the plot of  $\log(I_{432})$  as a function of  $\log(\eta)$ . Then the regression curve equation was obtained for the lower viscosity part.

The detection limit =  $3 \times S.D./k$

Where  $k$  is the slope of the curve equation, and  $S.D.$  represents the standard deviation for the  $\log(I_{432})$  of natural molecular sensor isoliquiritigenin.

$$\log(I_{432}) = 1.823 + 0.533 \times \log(\eta) \quad (R^2 = 0.990)$$

$$\log(\text{LOD}) = 3 \times 0.016 / 0.533 = 0.091$$

$$\text{LOD} = 10^{0.091} = 1.233 \text{ cP}$$

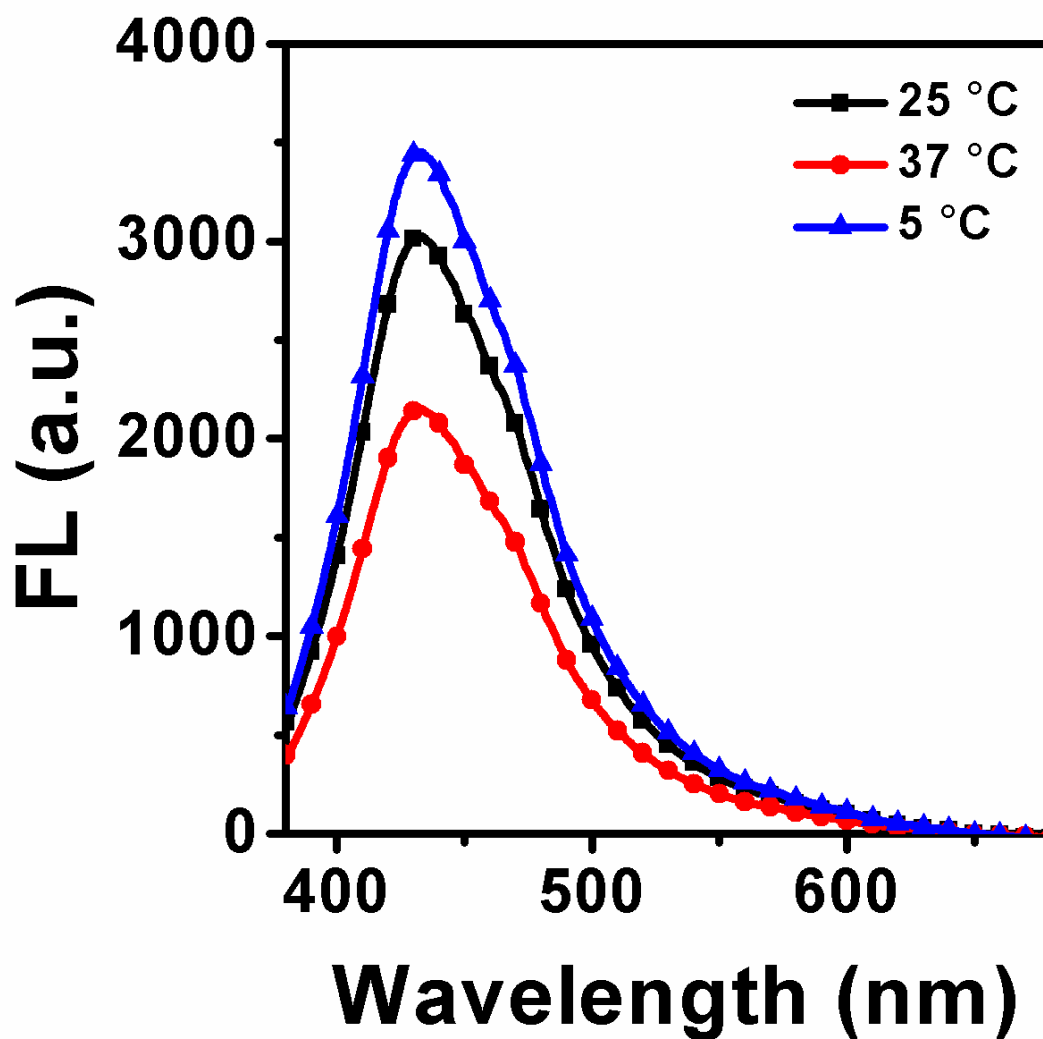

**Fig. S2** Fluorescence spectra of the natural molecular sensor isoliquiritigenin (10  $\mu\text{M}$ ) in glycerol under different temperatures, including the ambient temperature (25  $^{\circ}\text{C}$ ), higher storage temperature (37  $^{\circ}\text{C}$ ), and lower storage temperature (5  $^{\circ}\text{C}$ ).

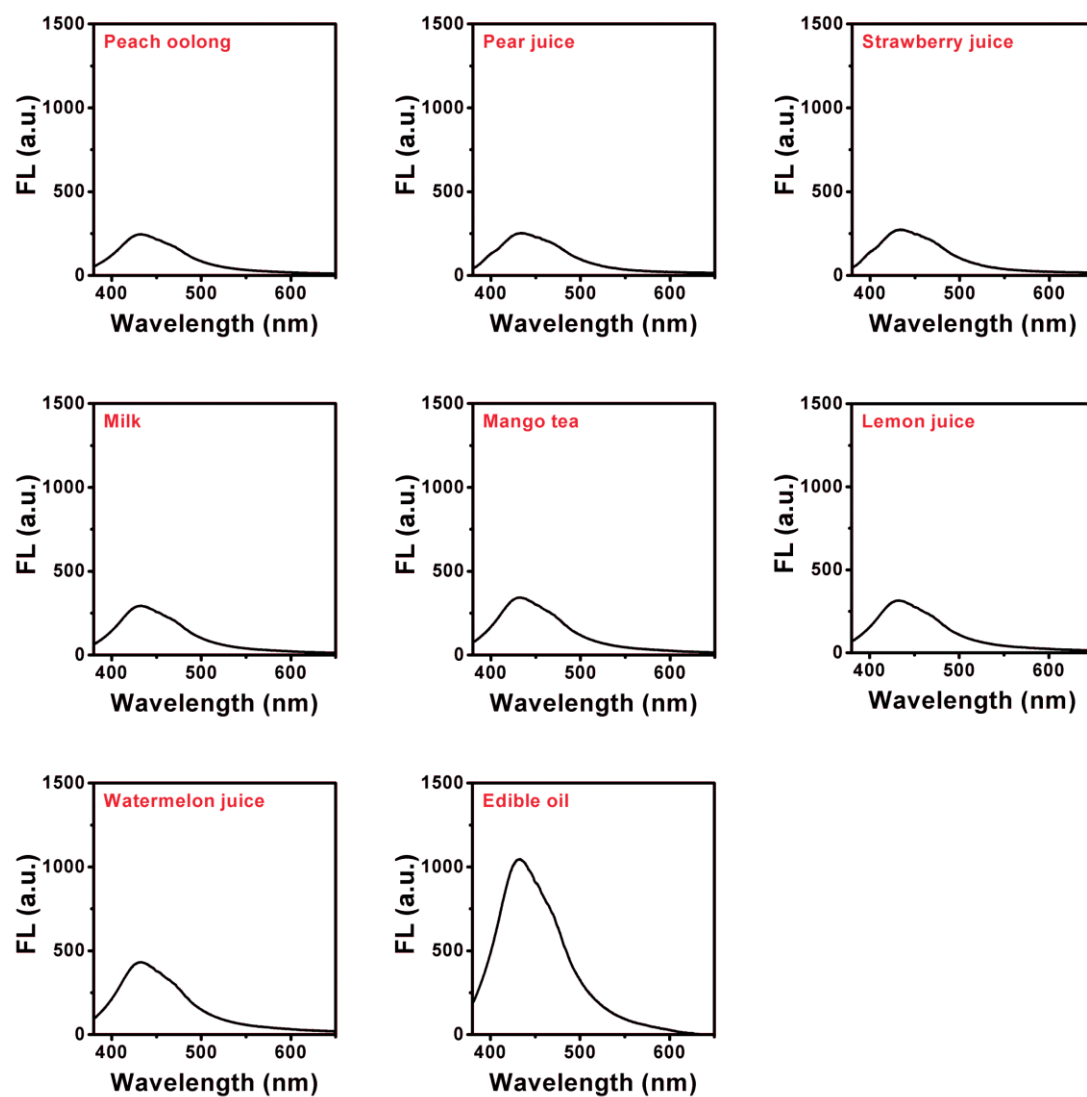

**Fig. S3** Fluorescence spectra of the natural molecular sensor isoliquiritigenin (10  $\mu$ M, containing 1% DMSO) in eight kinds of common liquid food, including peach oolong, pear juice, strawberry juice, milk, mango tea, lemon juice, watermelon juice and edible oil,  $\lambda_{\text{ex}}$ =350 nm.

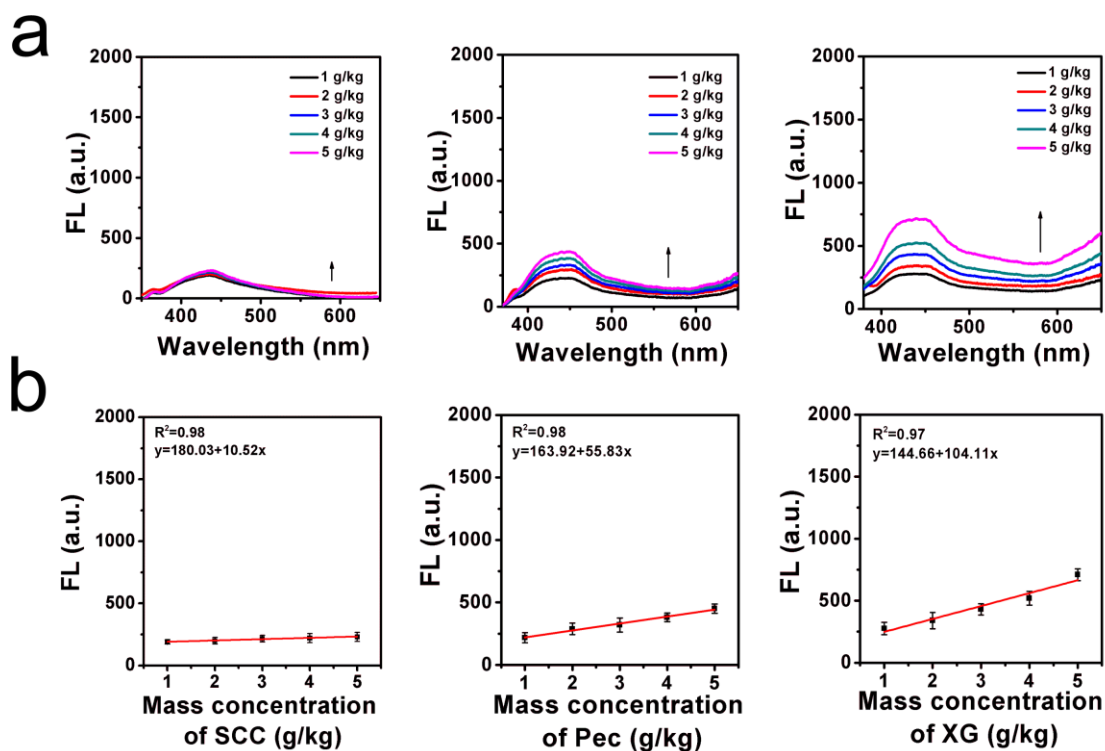

**Fig. S4** (a) Fluorescence spectra of the natural molecular sensor isoliquiritigenin in the presence of various mass amounts of sodium carboxymethyl cellulose (SCC), pectin (Pec) and xanthan gum (XG). (b) Fluorescence intensity of the natural molecular sensor isoliquiritigenin at emission peak and fitting line with the existence of various mass amounts of SCC, Pec, and XG. The concentration of the isoliquiritigenin = 10  $\mu$ M,  $\lambda_{ex}$ =350 nm.

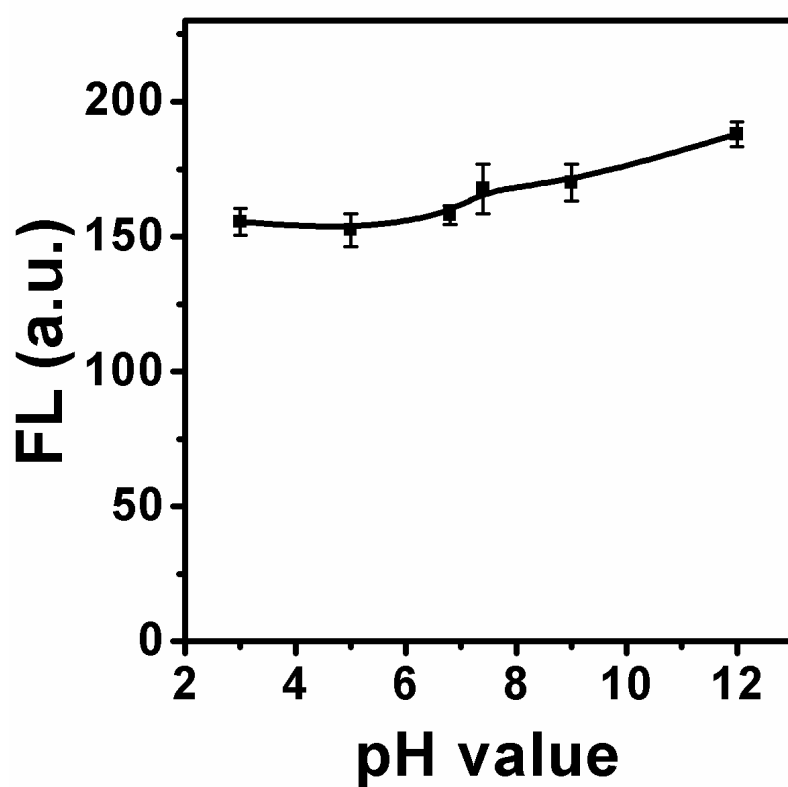

**Fig. S5** Fluorescence emission intensity of the natural molecular sensor isoliquiritigenin (10  $\mu$ M) at 432 nm under various pH values (containing 1% DMSO) in low viscosity water,  $\lambda_{\text{ex}}$ =350 nm.

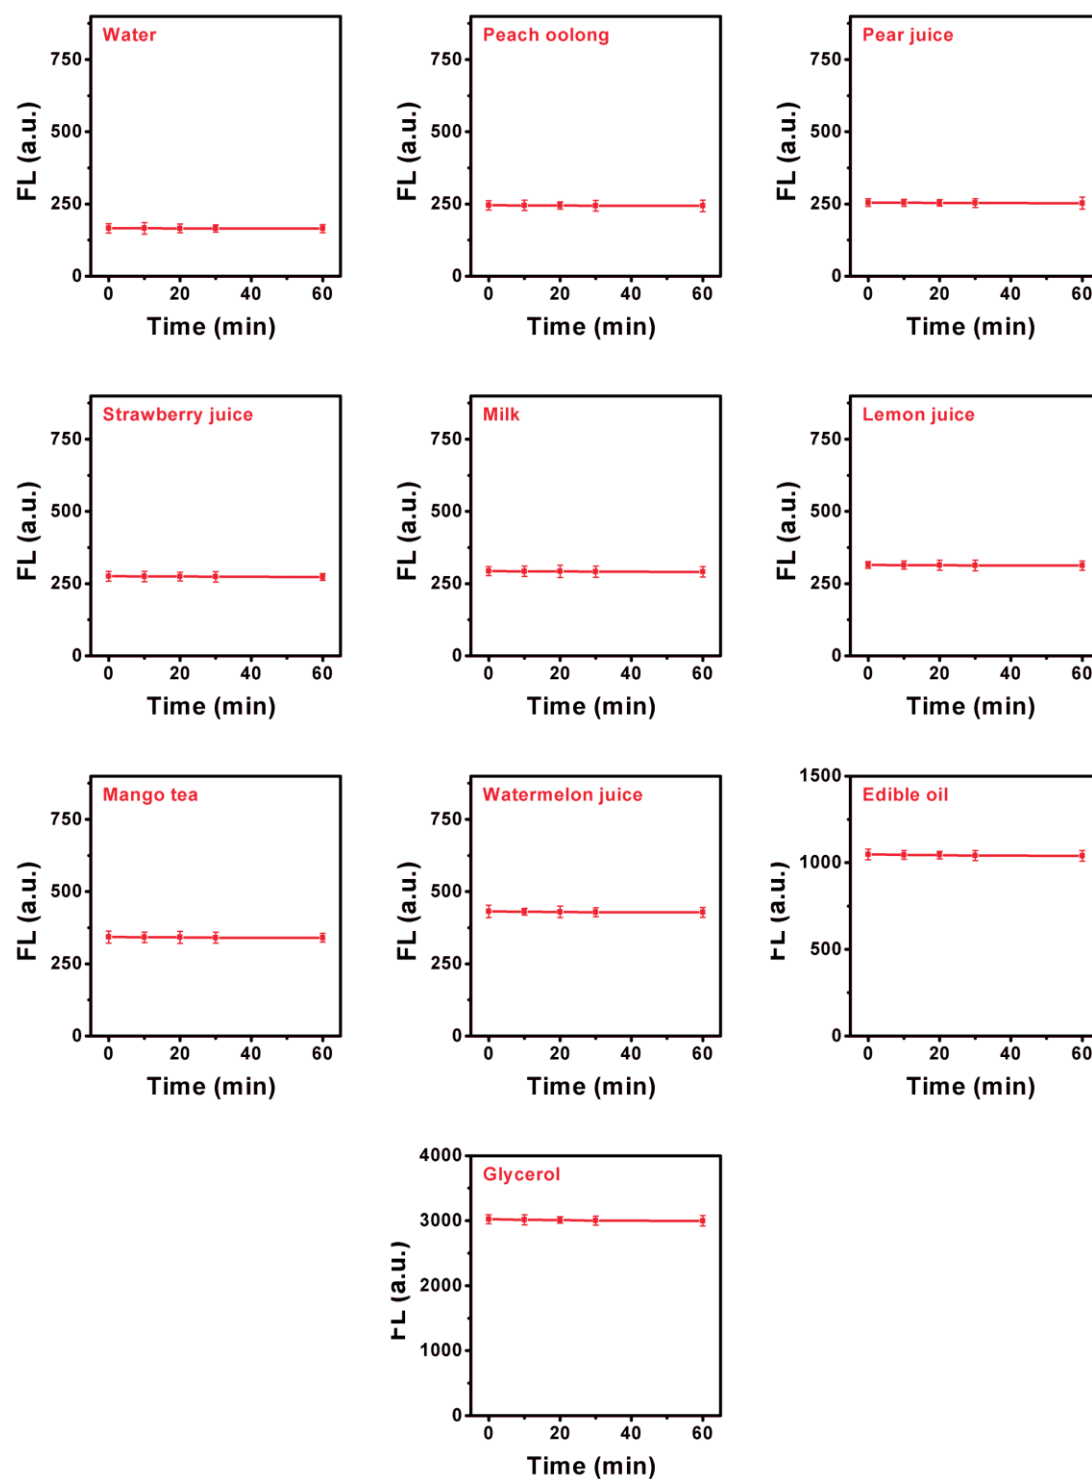

**Fig. S6** Photo-stability analysis of the natural molecular sensor isoliquiritigenin in water, glycerol and other eight kinds of common liquid food (containing 1% DMSO). All samples were tested under continuous light irradiation with a 430 nm UV lamp.



**a**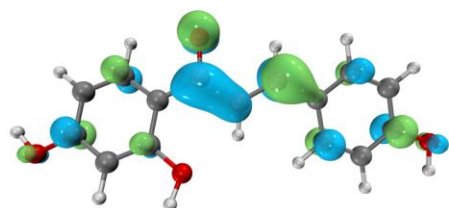**LUMO**

$$\Delta E = 3.94 \text{ eV} \updownarrow f = 0.0671$$

**HOMO**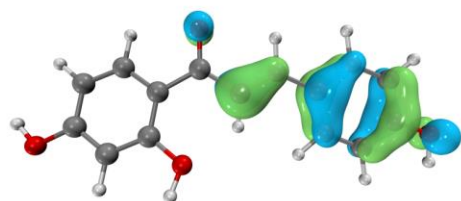**0°****b**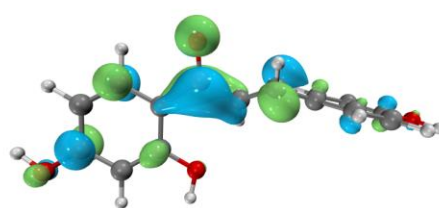**LUMO**

$$\Delta E = 4.28 \text{ eV} \updownarrow f = 0.0049$$

**HOMO**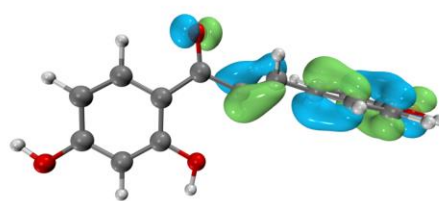**90°**

**Fig. S7** Optimized molecular structures and calculated molecular orbital energy levels of the HOMO and LUMO of isoliquiritigenin based on B3LYP/6-31G basis set.

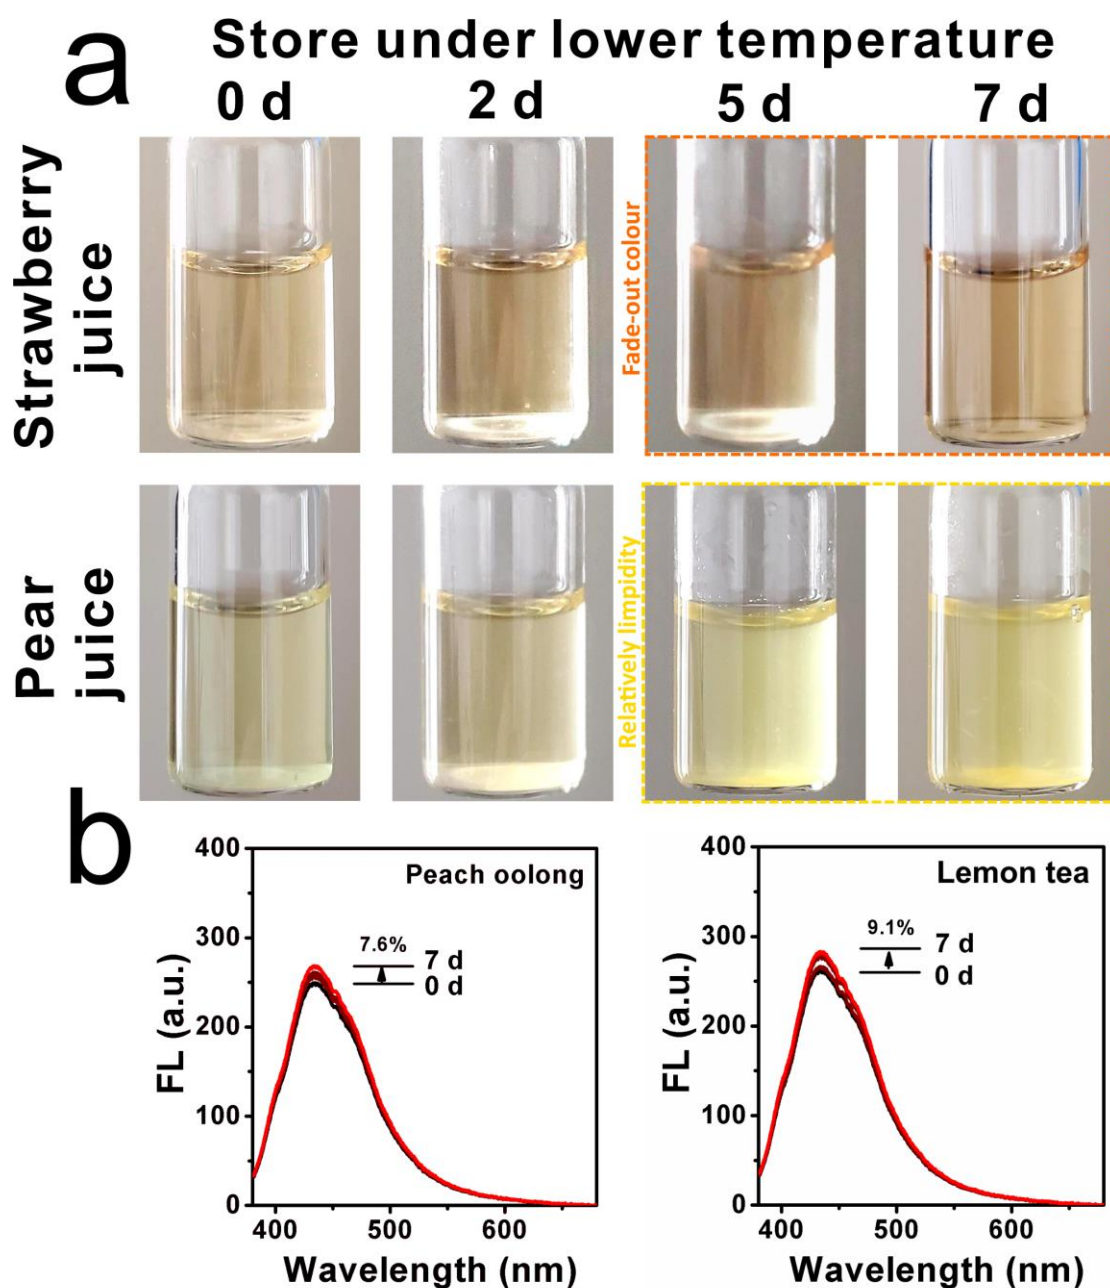

**Fig. S8** (a) Digital images of the peach oolong and lemon tea stored under lower temperatures (5 °C) for varying times (from 0 to 7 days). (b) Corresponding fluorescence spectra in peach oolong and lemon tea at different time intervals. Concentration of ILG = 10  $\mu$ M,  $\lambda_{\text{ex}}$ =350 nm.

**Table S1.** Comparison of the representative fluorescence-based dyes for viscosity detection reported in recent years.

| Probe                                                                               | Sources              | Stokes shift* | Application                                 | Reference |
|-------------------------------------------------------------------------------------|----------------------|---------------|---------------------------------------------|-----------|
| 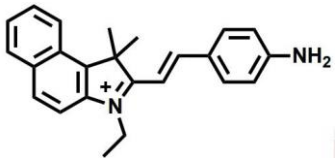   | Artificial synthesis | 72 nm         | Biological system, living cells.            | 1         |
|    | Artificial synthesis | 90 nm         | Biological system, living cells.            | 2         |
|    | Artificial synthesis | 20 nm         | Biological system, living cells.            | 3         |
|  | Artificial synthesis | 35 nm         | Biological system, living cells, in vivo.   | 4         |
|  | Artificial synthesis | 55 nm         | Biological system, living cells.            | 5         |
|  | Artificial synthesis | 20 nm         | Biological system, living cells, rat slice. | 6         |
|  | Artificial synthesis | 83 nm         | Biological system, living cells.            | 7         |

|                                                                                     |                      |         |                                                  |           |
|-------------------------------------------------------------------------------------|----------------------|---------|--------------------------------------------------|-----------|
| 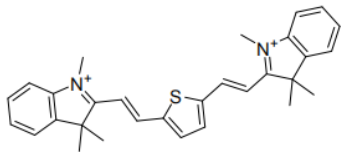   | Artificial synthesis | 70 nm   | Biological system, living cell.                  | 8         |
|    | Artificial synthesis | 90 nm   | Biological system, living cell, zebrafish, mice. | 9         |
|    | Artificial synthesis | 90 nm   | Biological system, living cell.                  | 10        |
|   | Artificial synthesis | 60 nm   | Biological system, living cell.                  | 11        |
|  | Natural product      | 52.5 nm | Liquid food, food spoilage analysis.             | This work |

\* The Stokes shift herein was obtained from the absorption and emission measured in the glycerol.

**Table S2.** Viscosity values of the liquids determined by a viscometer and fluorescent spectrometer.

| Liquids          | Viscosity (cP) | Calculated (cP) |
|------------------|----------------|-----------------|
| Peach oolong     | 1.85           | 1.88            |
| Pear juice       | 2.00           | 2.01            |
| Strawberry juice | 2.50           | 2.46            |
| Milk             | 2.91           | 2.98            |
| Lemon juice      | 3.50           | 3.55            |
| Mango tea        | 4.25           | 4.14            |
| Watermelon juice | 7.50           | 7.42            |
| Edible oil       | 68.10          | 68.00           |

**Table S3.** Photo-physical properties of the molecular sensor polydatin in different solvents.

| Solvents     | Dielectric constant ( $\epsilon$ ) | $\eta$ (cP) | Absorption $\lambda_{ab}$ (nm) | Emission $\lambda_{em}$ (nm) |
|--------------|------------------------------------|-------------|--------------------------------|------------------------------|
| Glycerol     | 45.8                               | 956.0       | 383.1                          | 432.2                        |
| Water        | 78.5                               | 1.0         | 378.2                          | 434.2                        |
| Toluene      | 2.4                                | 0.6         | 361.7                          | 411.5                        |
| Methanol     | 32.6                               | 0.6         | 372.9                          | 430.2                        |
| THF          | 7.4                                | 0.5         | 363.8                          | 419.3                        |
| Ethanol      | 24.9                               | 1.2         | 369.1                          | 425.3                        |
| Acetonitrile | 37.5                               | 0.4         | 372.3                          | 429.0                        |
| EA           | 6.1                                | 0.4         | 366.3                          | 421.2                        |
| DMF          | 36.7                               | 0.8         | 372.1                          | 428.4                        |
| DMSO         | 46.8                               | 2.1         | 376.3                          | 432.4                        |

## References

- 1 B. Chen, C. Li, J. Zhang, J. Kan, T. Jiang, J. Zhou and H. Ma, *Chem. Commun.*, 2019, **55**, 7410–7413.
- 2 G. Zhang, Y. Sun, X. He, W. Zhang, M. Tian, R. Feng, R. Zhang, X. Li, L. Guo, X. Yu and S. Zhang, *Anal. Chem.*, 2015, **87**, 12088–12095.
- 3 L.-L. Li, K. Li, M.-Y. Li, L. Shi, Y.-H. Liu, H. Zhang, S.-L. Pan, N. Wang, Q. Zhou and X.-Q. Yu, *Anal. Chem.*, 2018, **90**, 5873–5878.
- 4 M. Ren, L. Wang, X. Lv, J. Liu, H. Chen, J. Wang and W. Guo, *J. Mater. Chem. B*, 2019, **7**, 6181–6186.
- 5 L. Zhu, M. Fu, B. Yin, L. Wang, Y. Chen and Q. Zhu, *Dye. Pigment.*, 2020, **172**, 107859.
- 6 S. J. Park, B. K. Shin, H. W. Lee, J. M. Song, J. T. Je and H. M. Kim, *Dye. Pigment.*, 2020, **174**, 108080.
- 7 K. Zhou, M. Ren, B. Deng and W. Lin, *New J. Chem.*, 2017, **41**, 11507–11511.
- 8 Y. Baek, S. J. Park, X. Zhou, G. Kim, H. M. Kim and J. Yoon, *Biosens. Bioelectron.*, 2016, **86**, 885–891.
- 9 J. Yin, M. Peng and W. Lin, *Anal. Chem.*, 2019, **91**, 8415–8421.
- 10 Z. Zou, Q. Yan, S. Ai, P. Qi, H. Yang, Y. Zhang, Z. Qing, L. Zhang, F. Feng and R. Yang, *Anal. Chem.*, 2019, **91**, 8574–8581.
- 11 L. He, Y. Yang and W. Lin, *Anal. Chem.*, 2019, **91**, 15220–15228.
